# Supplementary material for: Tween-20-Modified BiVO4 Nanorods for CT Imaging-Guided Radiotherapy of Tumor
Source: PubMed Central journal article supplement — ACS Omega. 2023 Jan 25;8(5):4736–46. doi: 10.1021/acsomega.2c06714 (PMC9910094; doi:10.1021/acsomega.2c06714), 2023-01-25
Supplement: ao2c06714_si_001.pdf [file ao2c06714_si_001.pdf]

## Supporting Information

### Tween-20 Modified BiVO<sub>4</sub> Nanorods for CT Imaging-Guided Radiotherapy of Tumor

Bo Peng,<sup>1</sup> Yifan Hao,<sup>2</sup> Chao Si,<sup>2</sup> Bo Wang,<sup>1</sup> Chengfeng Luo,<sup>1</sup> Menghao Chen,<sup>1</sup> Cheng Luo,<sup>3</sup>  
Baijuan Gong,<sup>3</sup> and Zhimin Li<sup>1,\*</sup>

<sup>1</sup>Department of Oral Radiology, School of Stomatology, China Medical University, Shenyang 110002, P. R. China, <sup>2</sup>Department of Oral Radiology, Hospital of Stomatology, Jilin University, Changchun 130021, P. R. China, and <sup>3</sup>Department of Orthodontics, School of Stomatology, China Medical University, Shenyang 110002, P. R. China.

\*Address correspondence to [zmli@cmu.edu.cn](mailto:zmli@cmu.edu.cn).

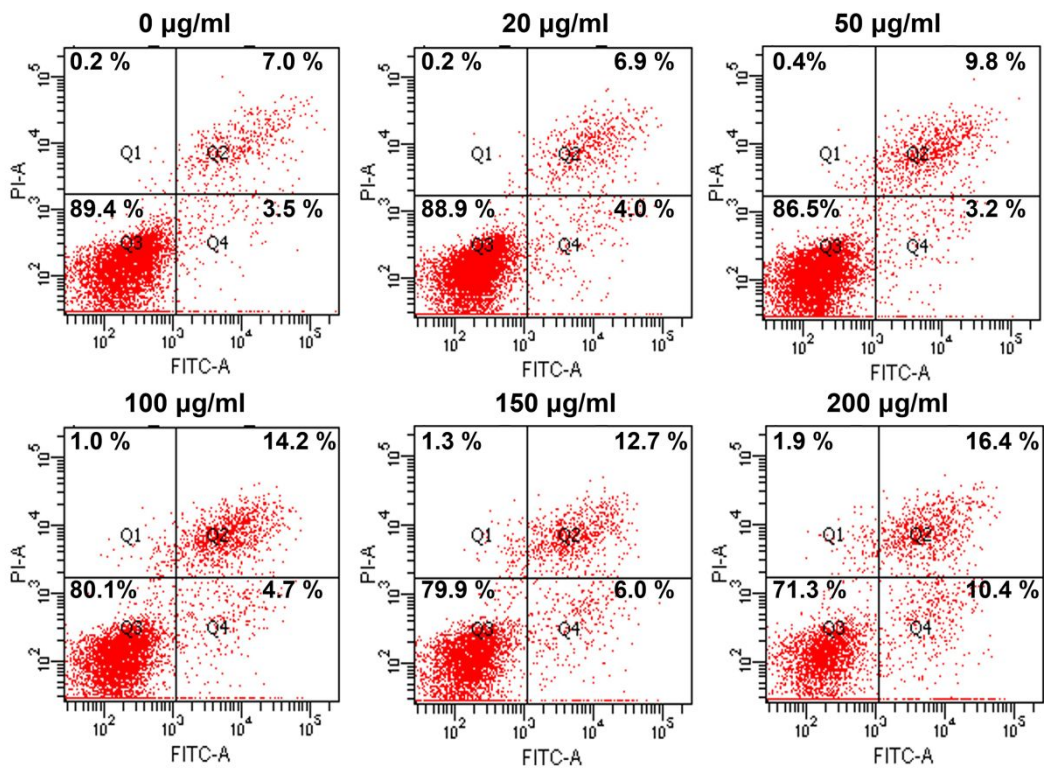

**Figure S1.** The apoptosis conducted by flow cytometry analysis of CAL27 cells under different concentrations of Tw20-BiVO<sub>4</sub> NRs.

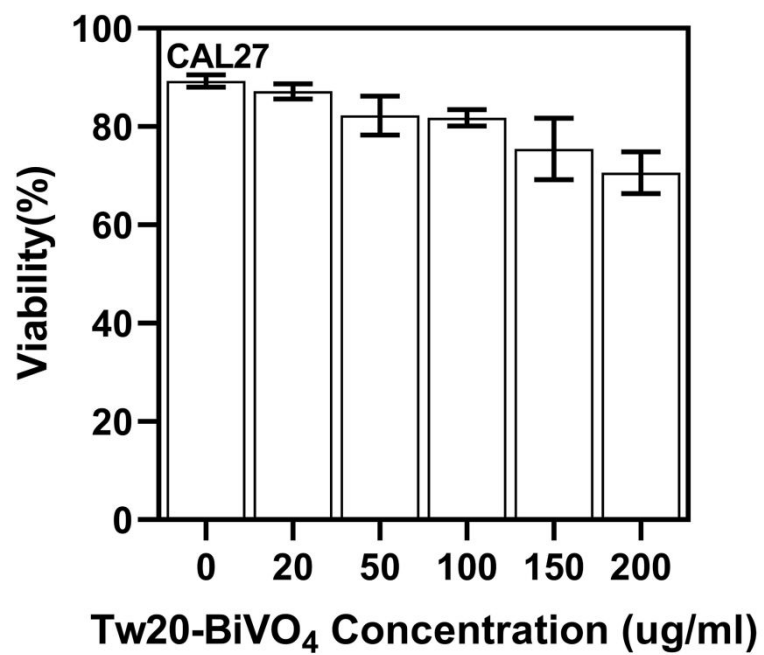

**Figure S2.** The cell viability conducted by flow cytometry analysis of CAL27 cells under different concentrations of Tw20-BiVO<sub>4</sub> NRs, the data are given as mean±S.D.

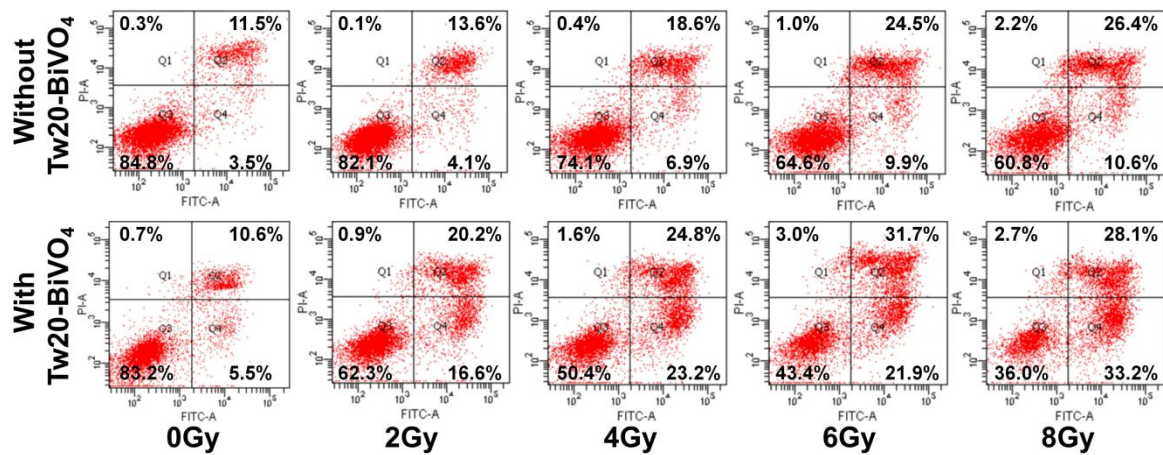

**Figure S3.** The apoptosis conducted by flow cytometry analysis of CAL27 cells after the treatment under different X-ray irradiation does with or without 100 µg/mL Tw20-BiVO<sub>4</sub> NRs.

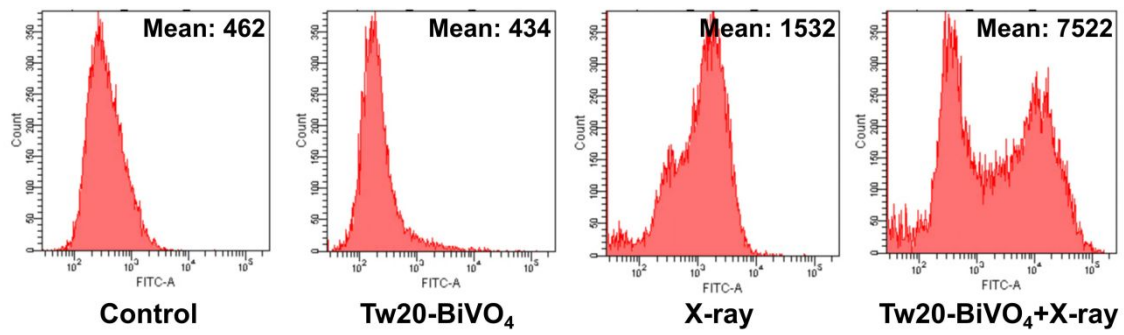

**Figure S4.** Flow cytometric analysis of ROS levels in CAL27 cells after different treatments.

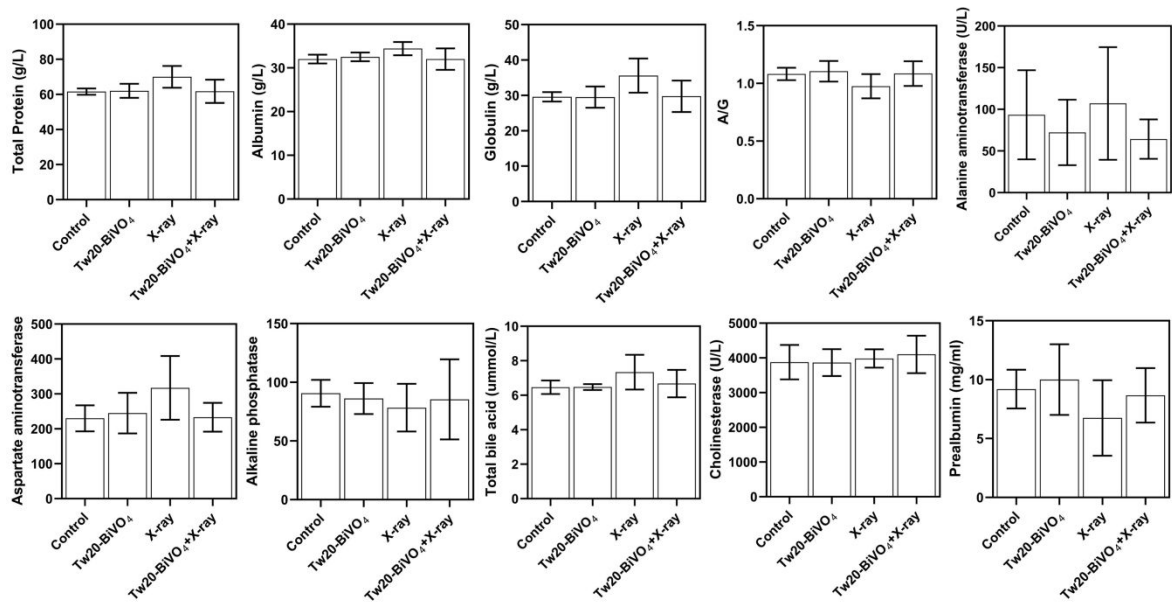

**Figure S5.** Blood liver function tests analysis of mice in each group after treatments.

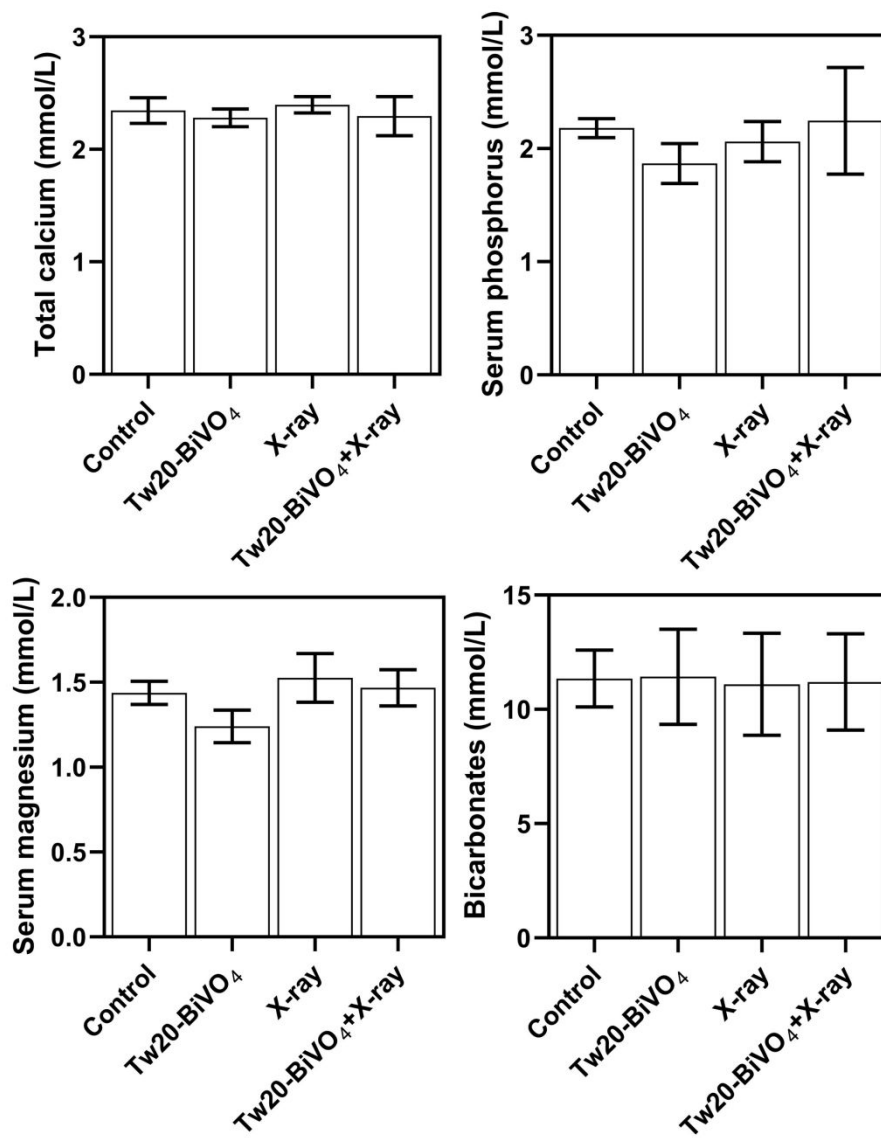

**Figure S6.** Blood renal function tests analysis of mice in each group after treatments.

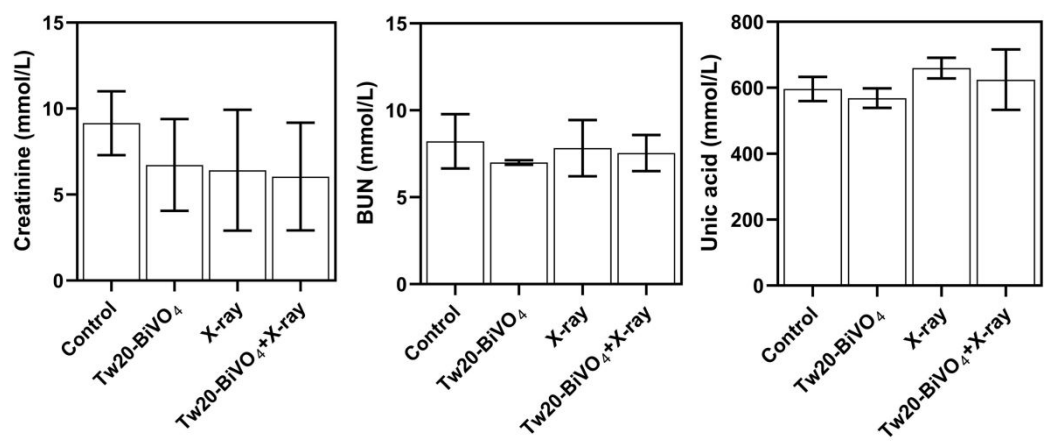

**Figure S7.** Blood ion detection analysis of mice in each group after treatments.
